# Supplementary material
Source: publisher figshare collection journal article supplement (https://sage.figshare.com/ndownloader/files/14885078)
Supplement: Supplementary file 1 [file 14885078]

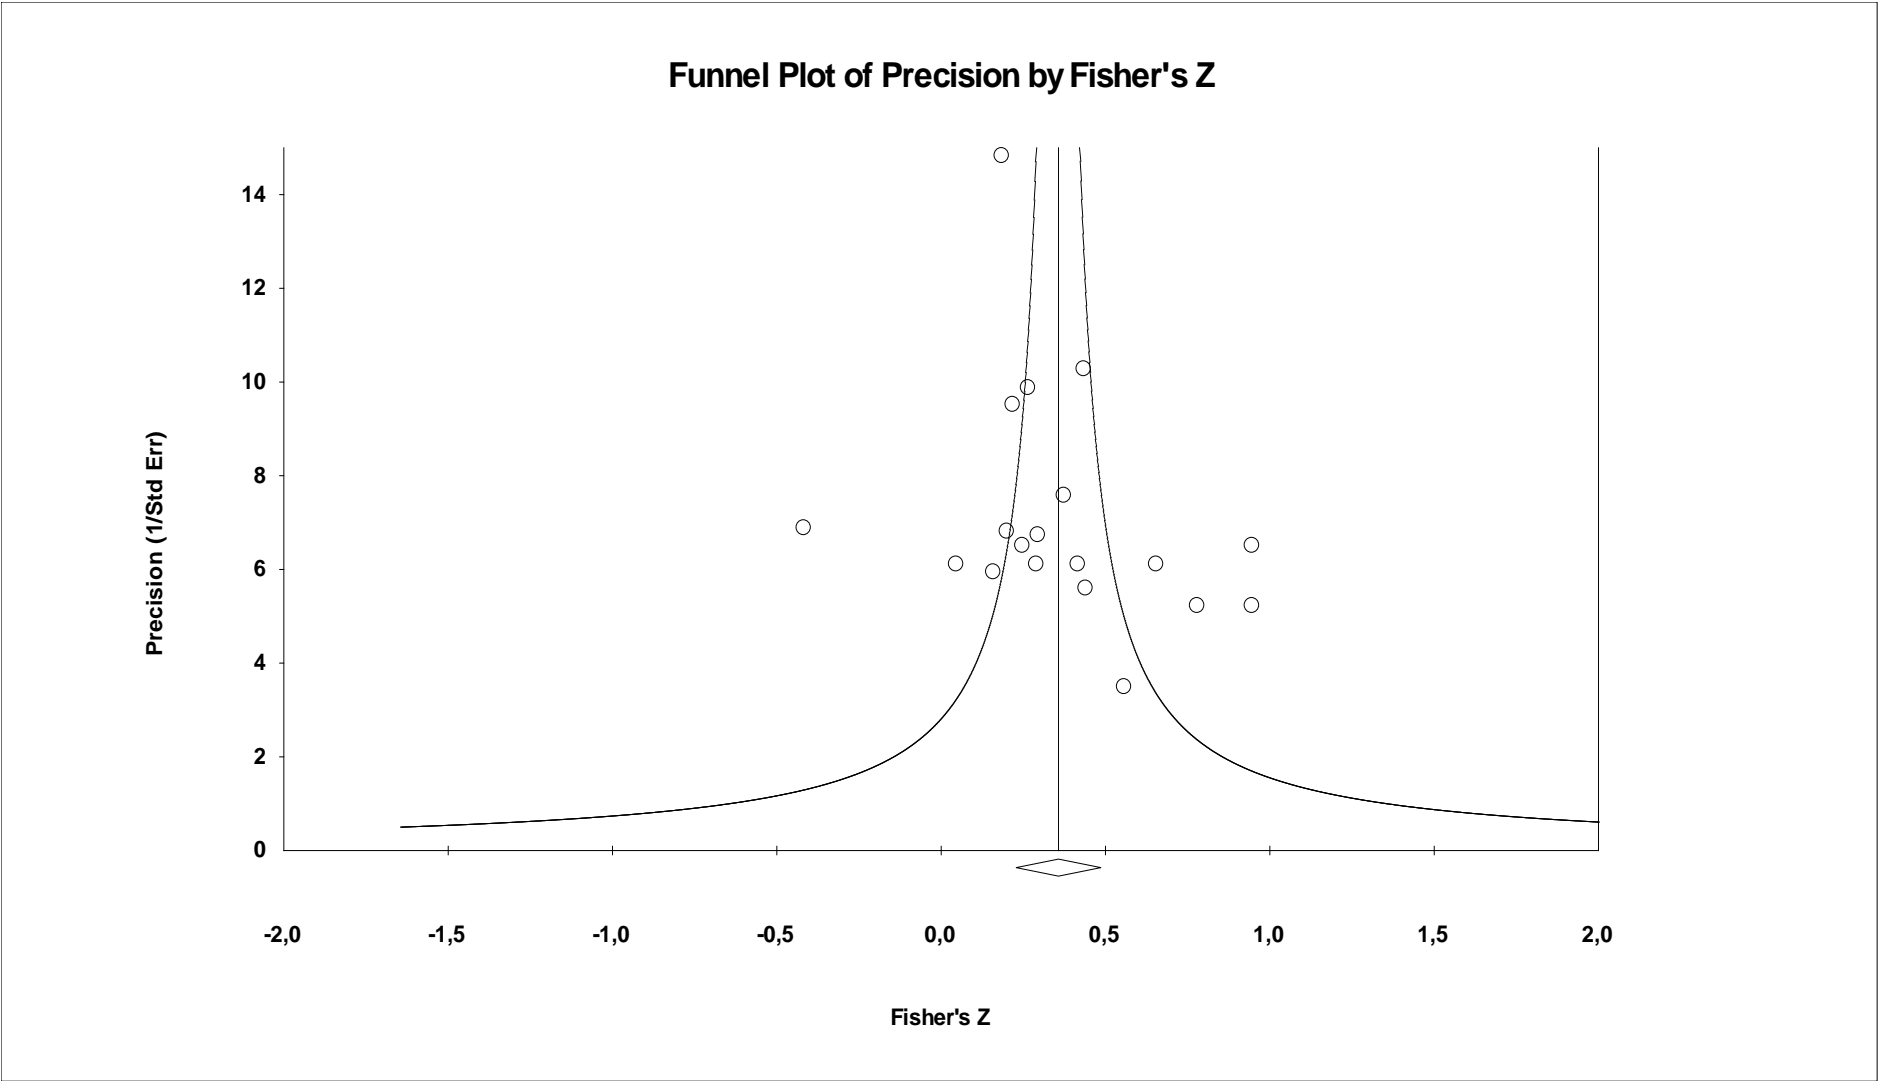

*Additional figure A.* Funnel plot of studies of comparing hypocrisy vs. control conditions on intention

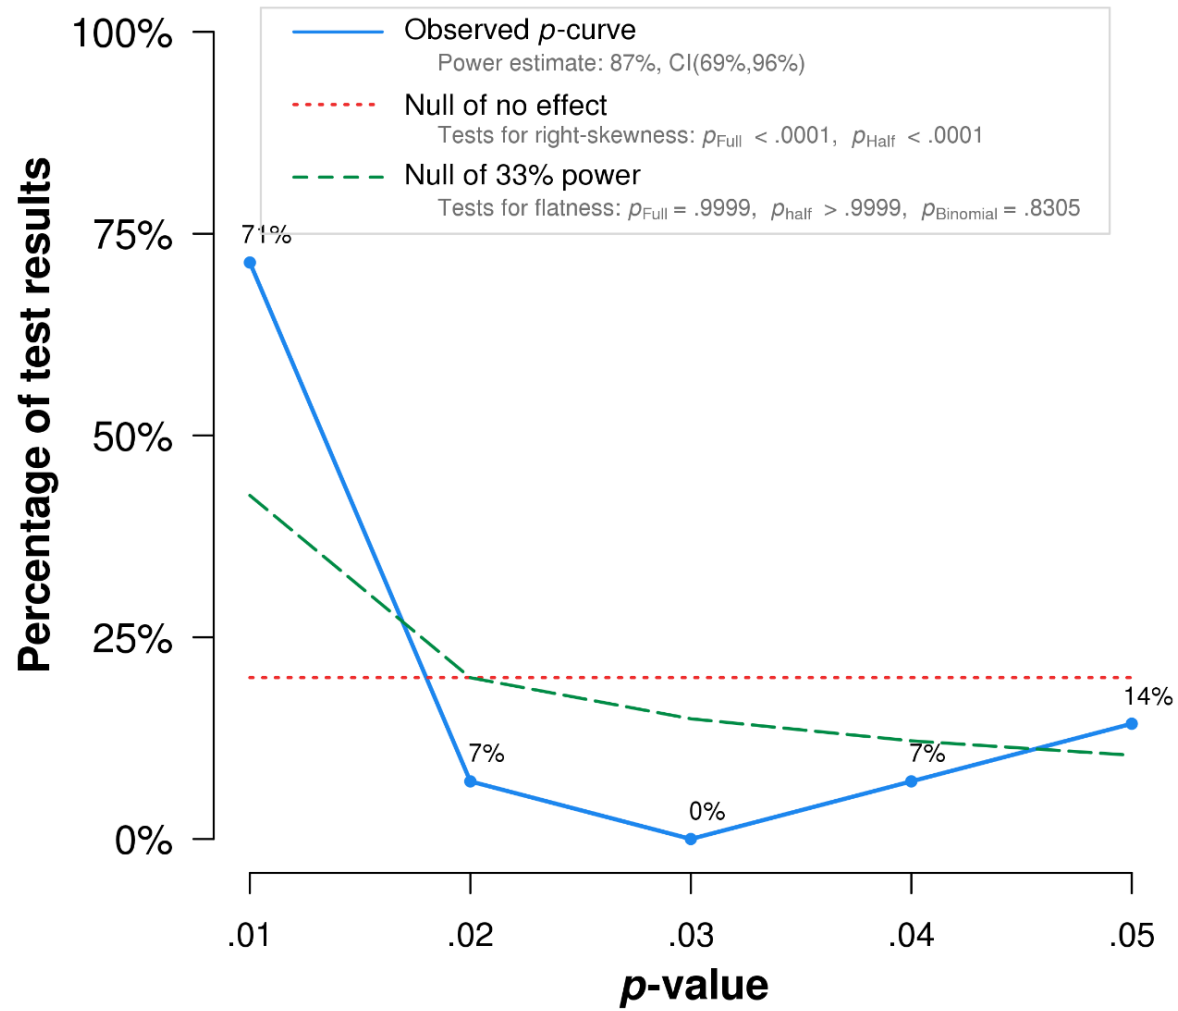

Note: The observed  $p$ -curve includes 14 statistically significant ( $p < .05$ ) results, of which 11 are  $p < .025$ . There were 5 additional results entered but excluded from  $p$ -curve because they were  $p > .05$ .

Additional figure B.  $p$ -curve of studies of comparing hypocrisy vs. control conditions on intention

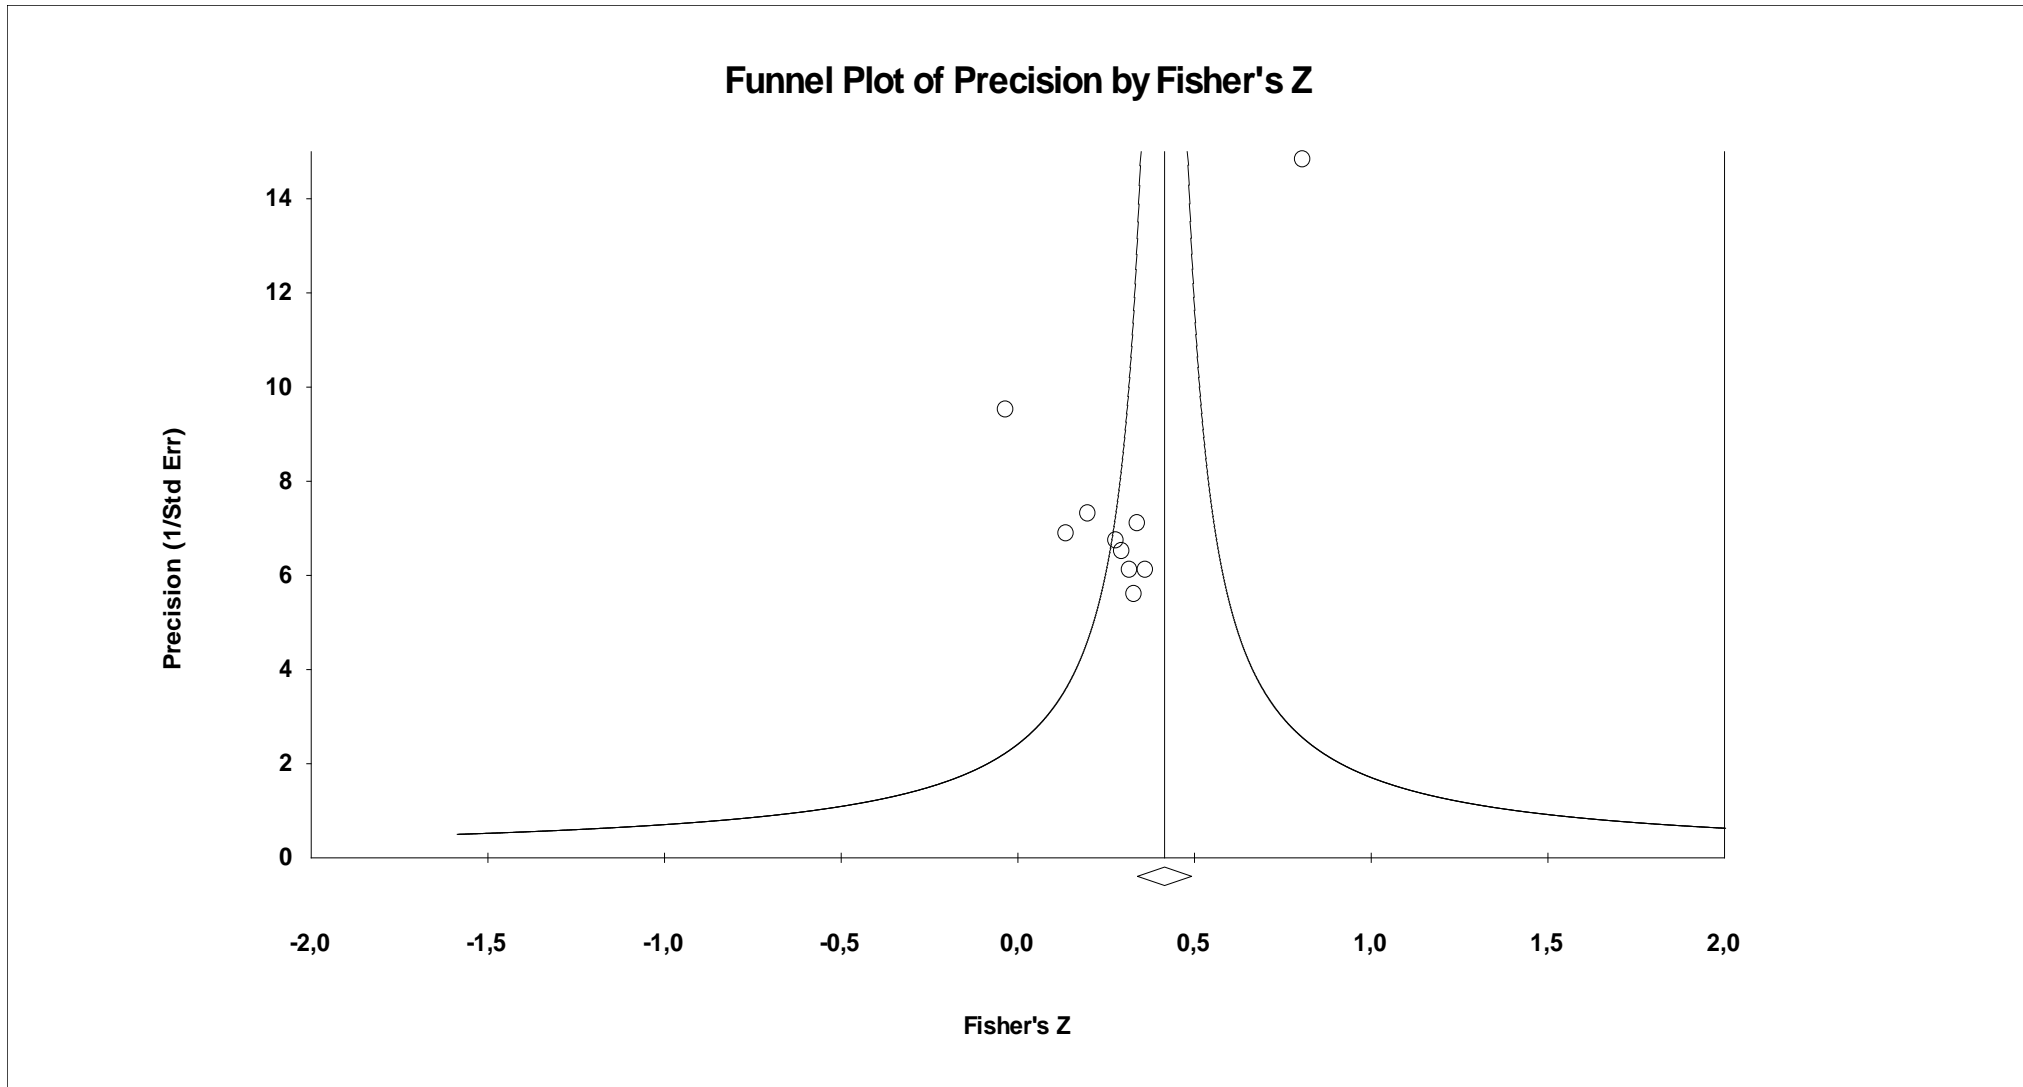

*Additional figure C.* Funnel plot of studies of comparing hypocrisy and control conditions on behavior

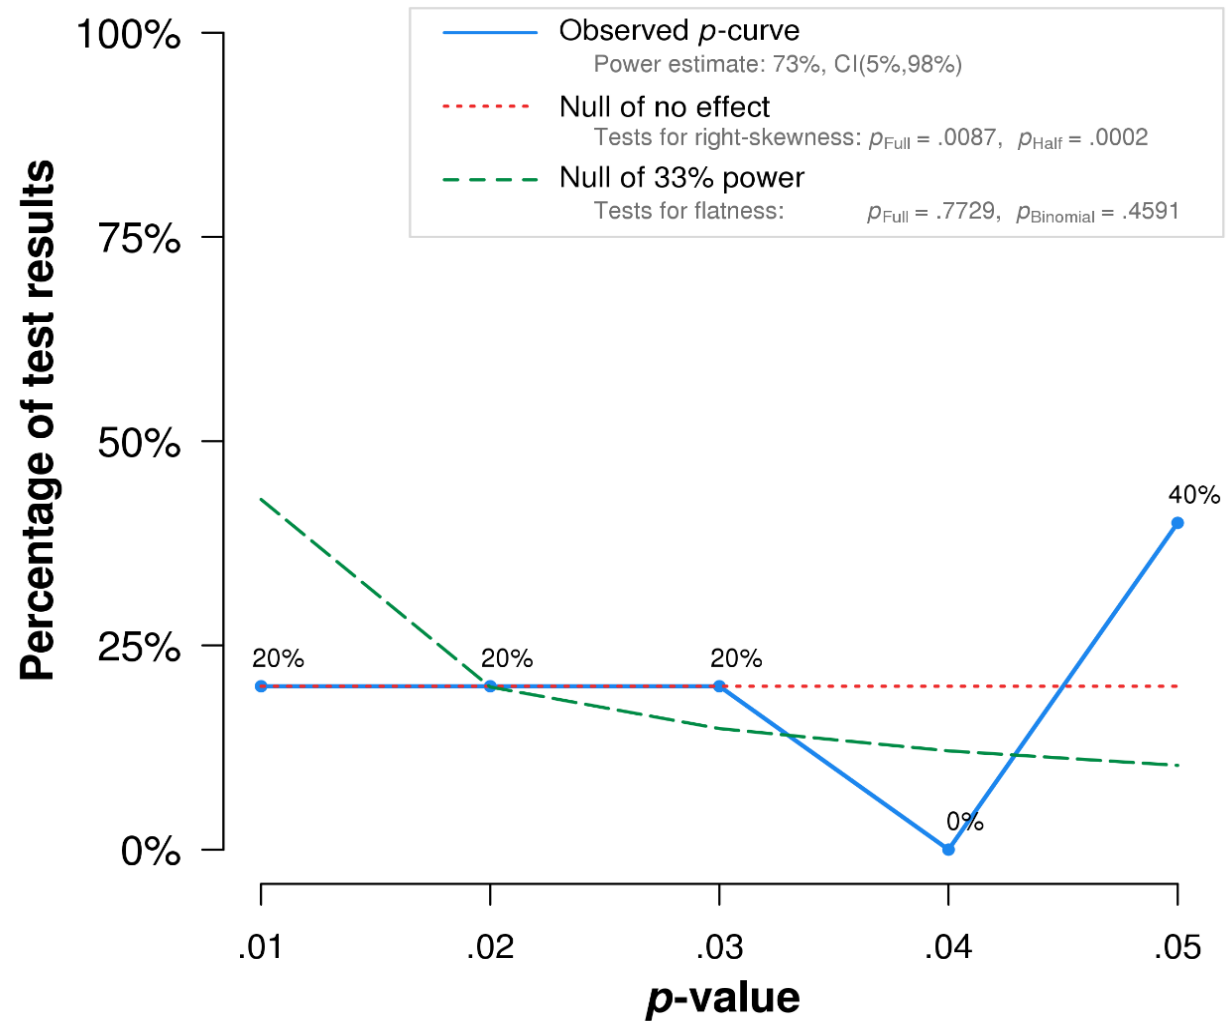

Note: The observed *p*-curve includes 5 statistically significant ( $p < .05$ ) results, of which 3 are  $p < .025$ . There were 5 additional results entered but excluded from *p*-curve because they were  $p > .05$ .

Additional figure D. *p*-curve of studies of comparing hypocrisy and control conditions on behavior

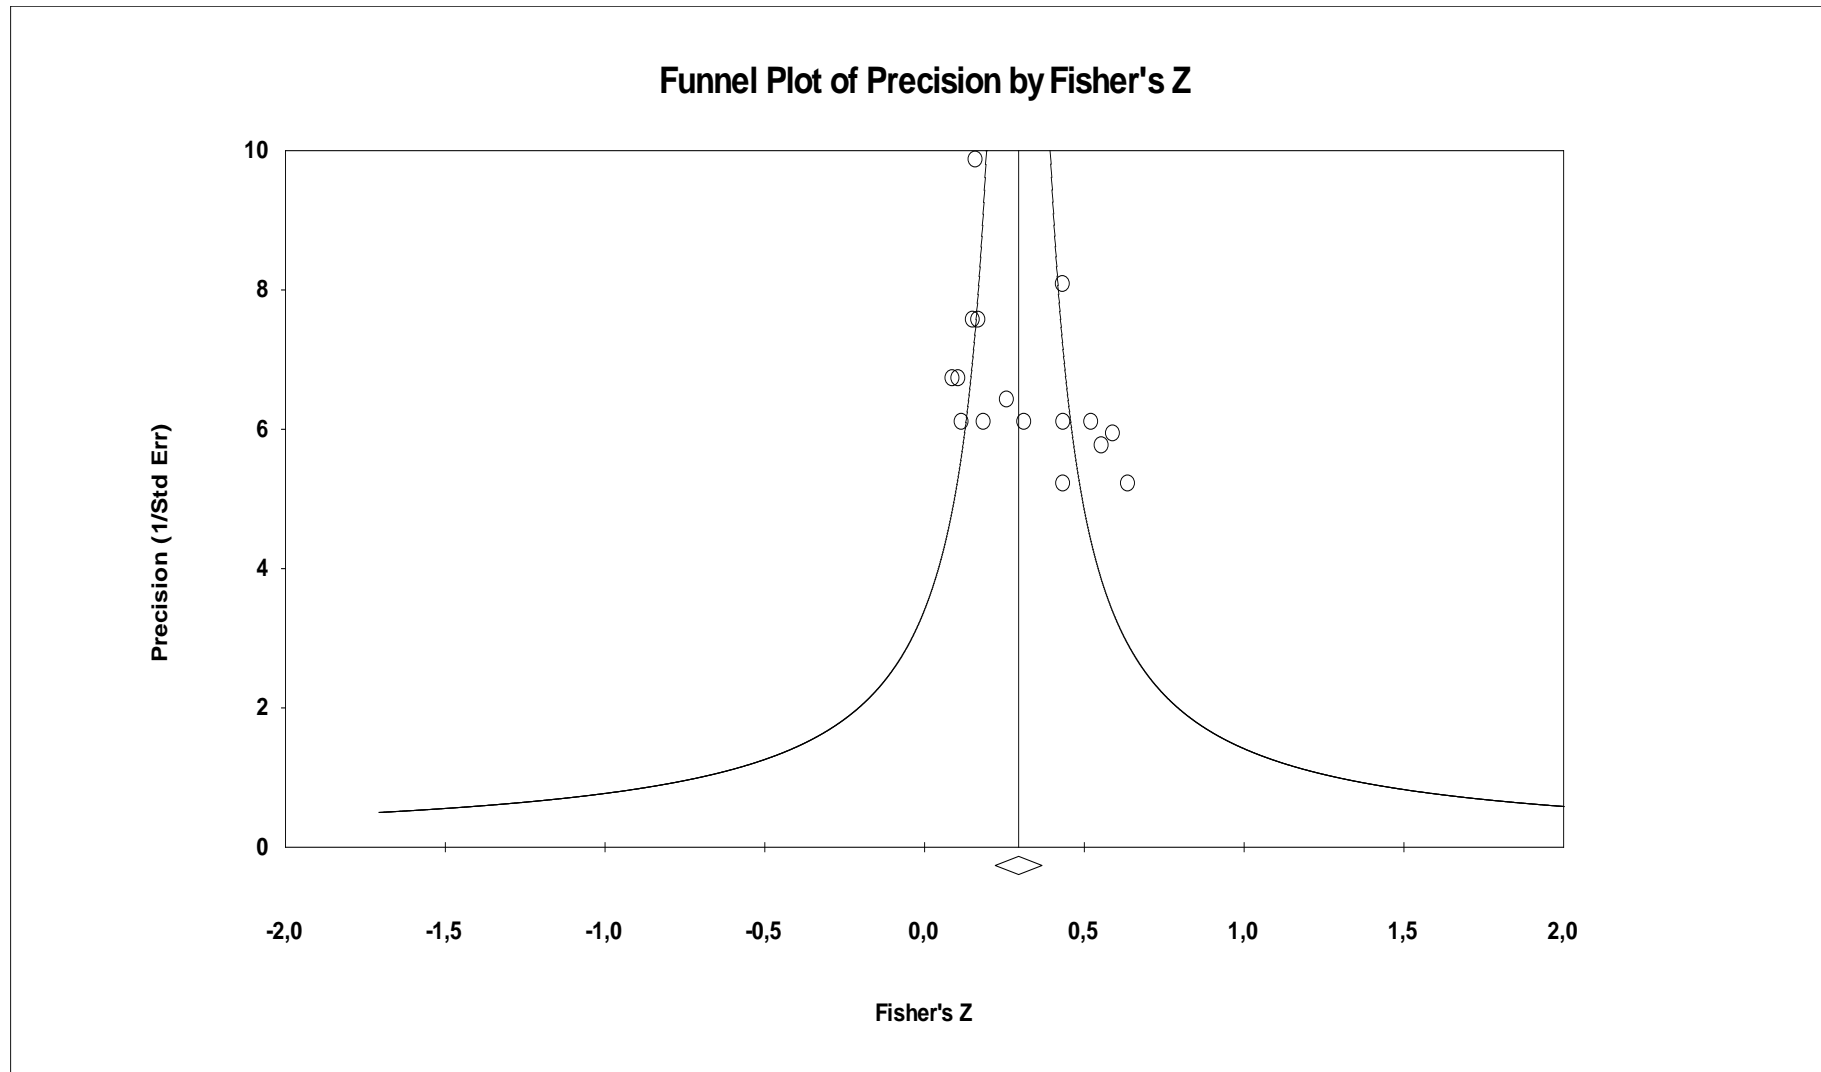

*Additional figure E.* Funnel plot of studies of comparing hypocrisy and only-SNB conditions on intention

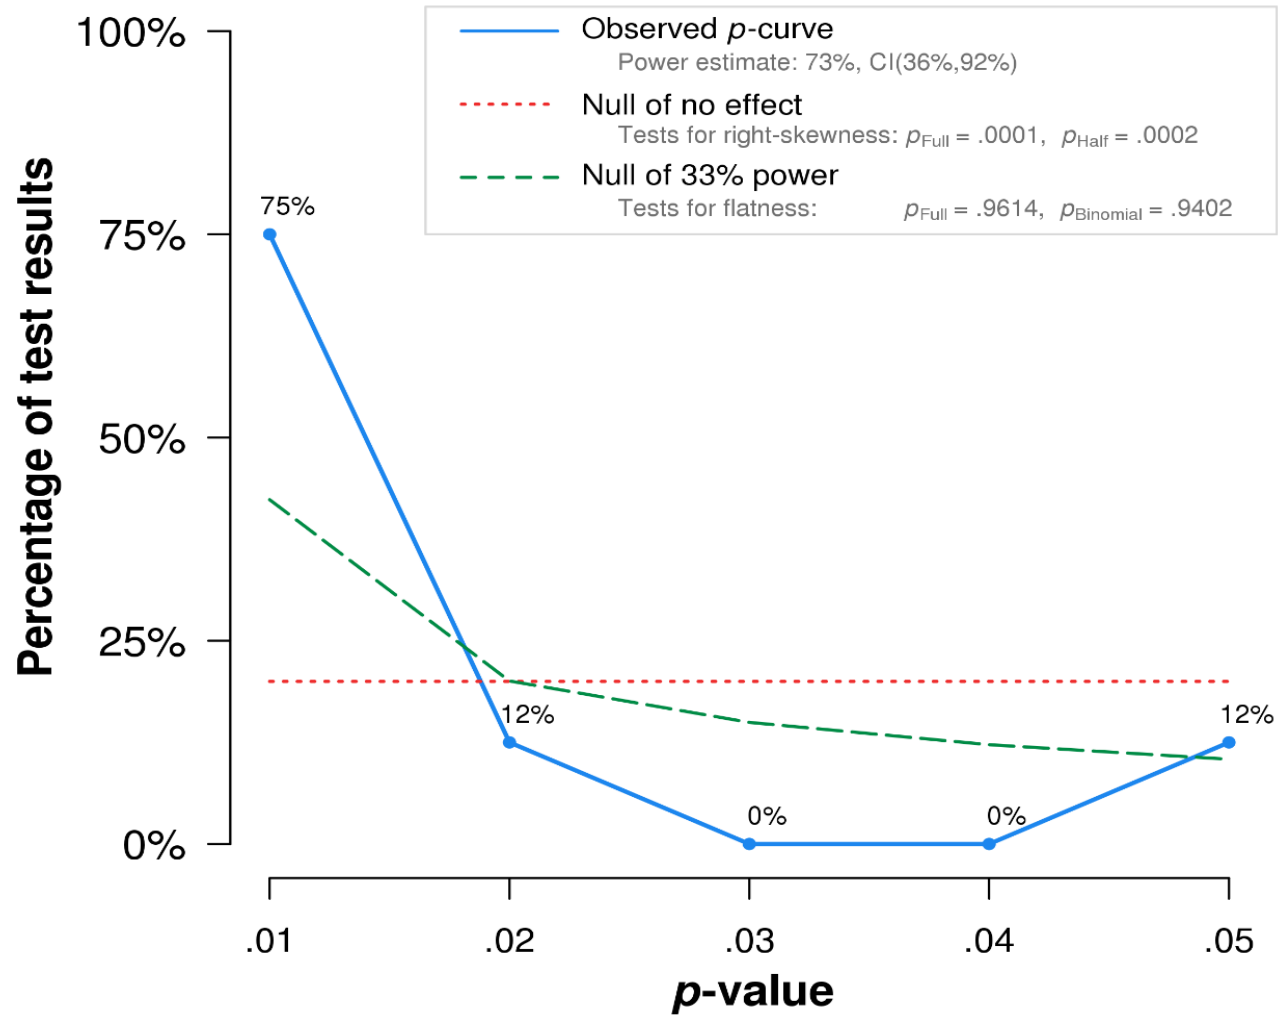

Note: The observed  $p$ -curve includes 8 statistically significant ( $p < .05$ ) results, of which 7 are  $p < .025$ . There were 8 additional results entered but excluded from  $p$ -curve because they were  $p > .05$ .

Additional figure F.  $p$ -curve of studies of comparing hypocrisy and only-SNB conditions on intention

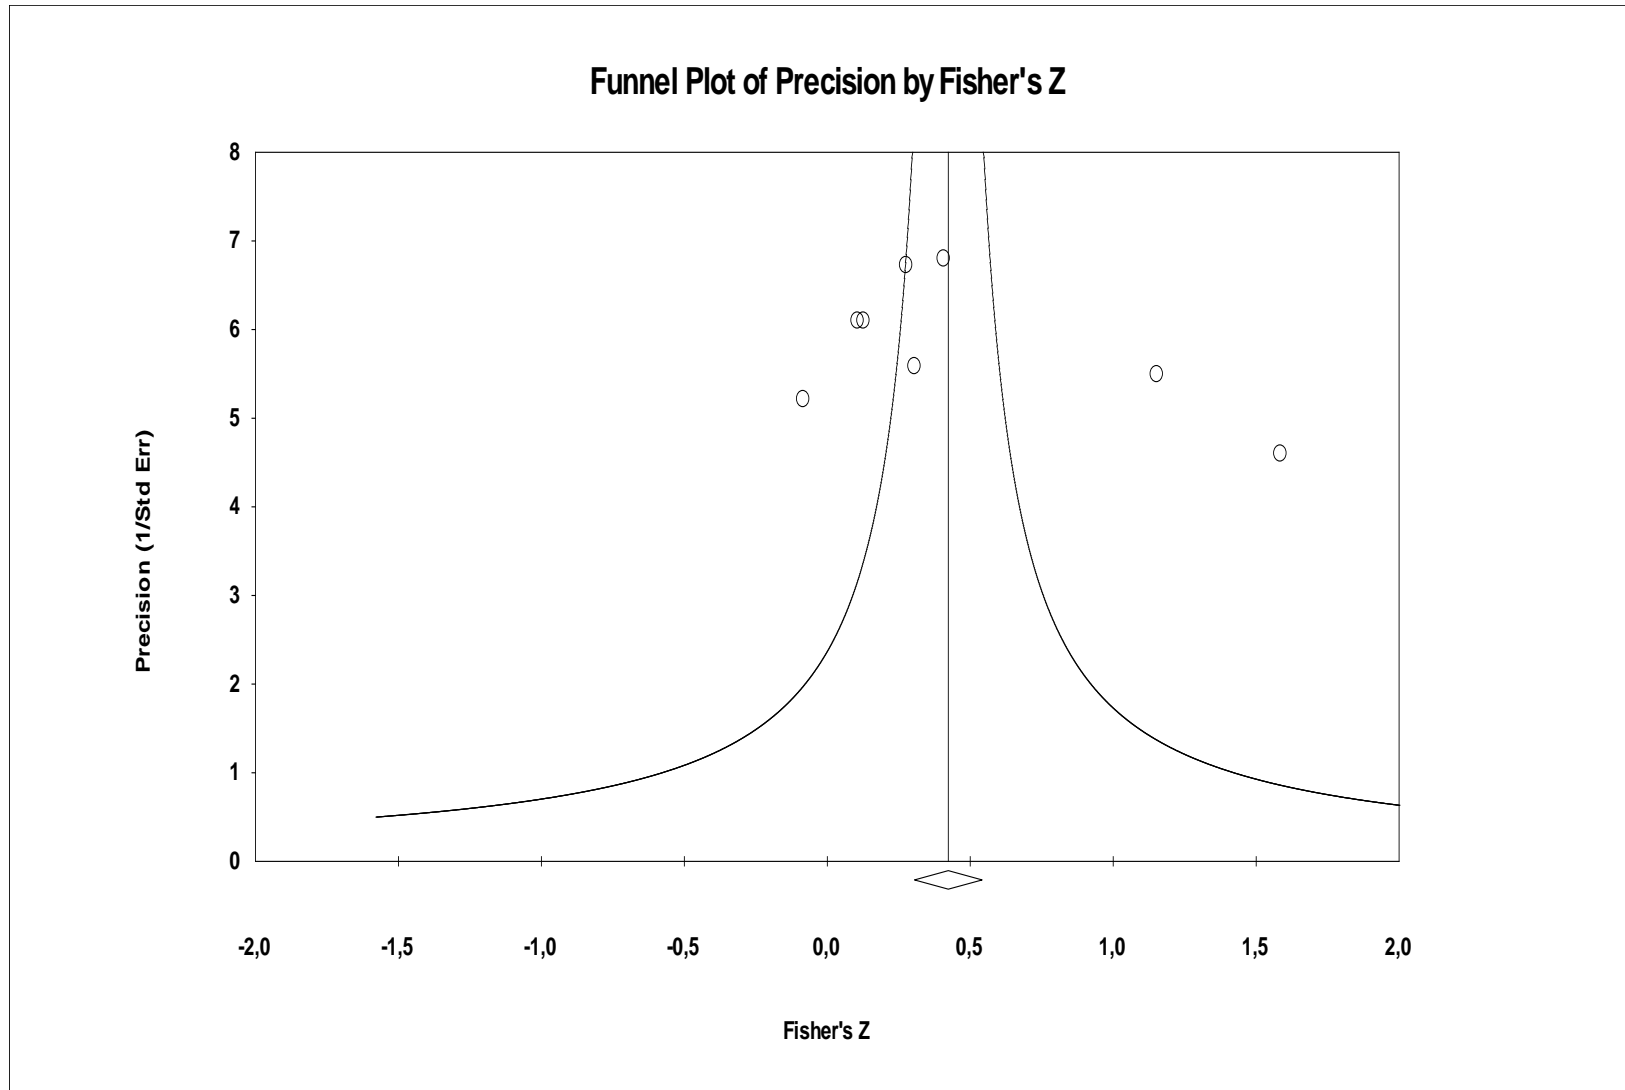

*Additional figure G.* Funnel plot of studies of comparing hypocrisy and only-SNB conditions on behavior
